# Supplementary material
Source: publisher site journal article supplement (https://www.dovepress.com/article/548192)
Supplement: Supplementary file 1 [file Supplementary.docx]

**Supplementary figures and tables:**

**Figure S1.** Flowchart of pediatric generalized pustular psoriasis (GPP) patients selection

**The pediatric GPP inpatients (n=62) diagnosed according to Asia-Pacific consensus criteria (March 1, 2017 and February 29, 2024)**

**Excluded (n=1)：**

The diagnosis was corrected to EKC syndrome at follow-up (n=1)

**Pediatric patients for analysis (n=61)**

34 patients with complete follow-up information on GPP flares at post-discharge, as of Jun. 2024

**Patients excluded for efficacy analyses (n=6):**

Pustules lacked pustules lesions at admission (n=3)

Patients who self-discharged (n=3)

38 patients with post-discharge GPPGA scores. n=38, 35, 26 at week 24, 48, 96, respectively.

Not for comparison in combination therapy (n=4)

**51 inpatients with GPPGA scores for efficacy** **comparison**

**
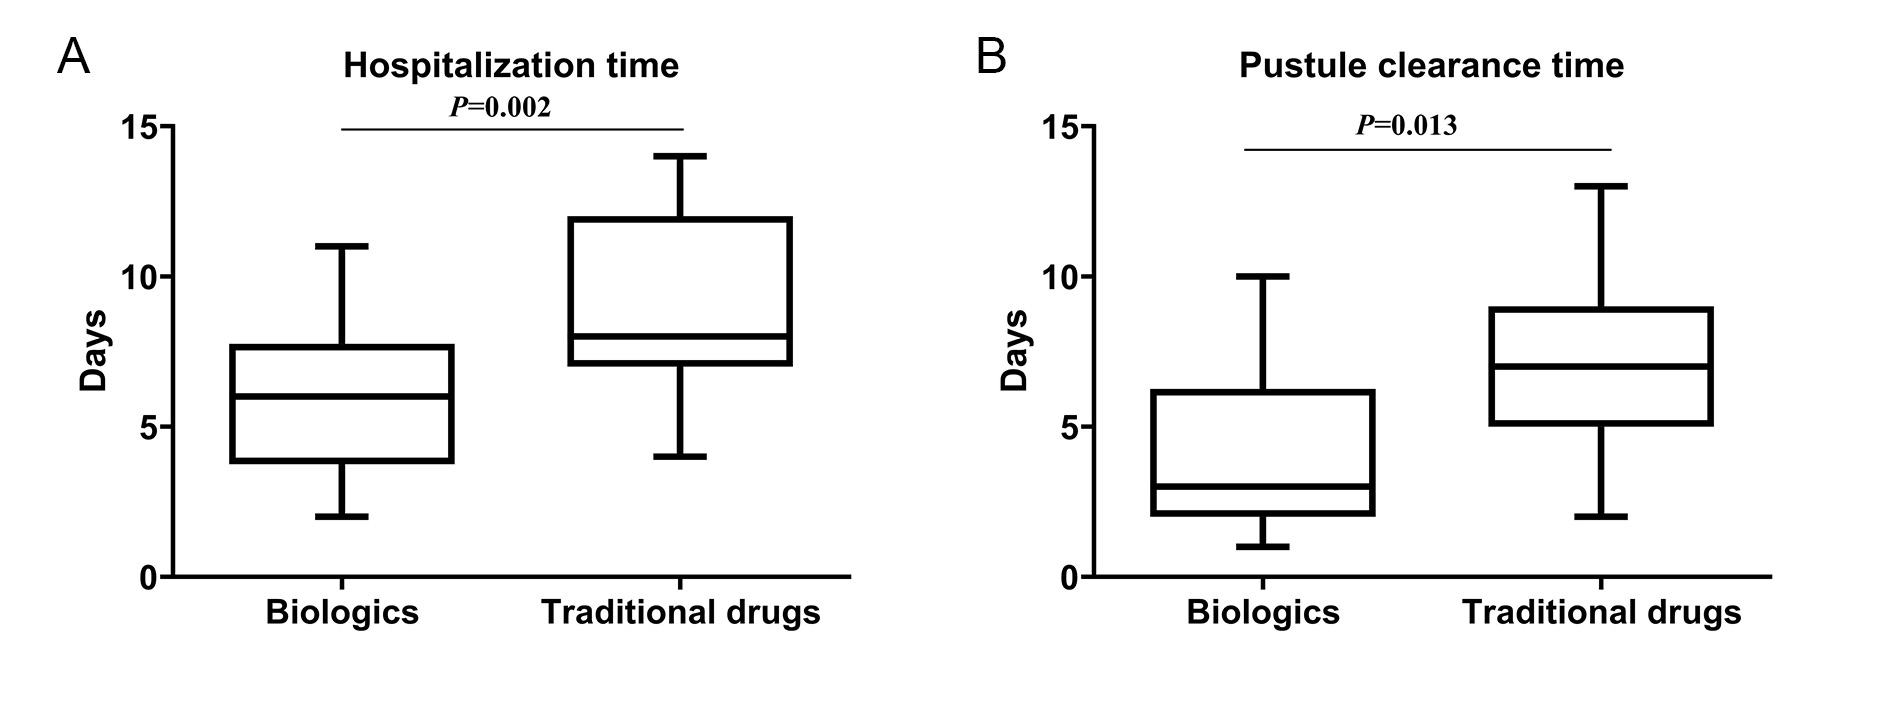
**

**Figure S2. Differences in hospitalization time (A) and pustule clearance time (B) between biologics and traditional drugs.**

Data presented are the mean values and extreme values.

**Table S1. Comparison of demographic and clinical characteristics of GPP with PV and without PV.**

|  | All | GPP with PV | GPP without PV | *P* value |
| --- | --- | --- | --- | --- |
| Male sex | 37 (60.7) | 15 (57.7) | 22 (62.9) | 0.683 |
| Ag, year | 10.6±3.2 | 10.4±3.4 | 10.7±3.2 | 0.783 |
| Age of GPP onset, year | 8.8±3.7 | 9.5±4.1 | 8.5±3.2 | 0.336 |
| 0-5 | 7 (11.5) | 4 (15.4) | 3 (8.6) |  |
| 6-12 | 47 (77.0) | 18 (69.2) | 29 (82.9) |  |
| 13-17 | 7 (11.5) | 4 (15.4) | 3 (8.6) |  |
| Weight, kg | 39.4±12.2 | 41.2±13.5 | 38.1±11.2 | 0.337 |
| History of family psoriasis | 12 (19.7) | 8 (30.8) | 4 (11.4) | 0.060 |
| Concomitant symptoms | 57 (93.4) | 23 (88.5) | 34 (97.1) | 0.406 |
| Pruritus | 48 (78.7) | 20 (76.9) | 28 (80.0) | 0.772 |
| Fever | 39 (63.9) | 18 (69.2) | 21 (60.0) | 0.458 |
| Temp＞39℃ | 18 (29.5) | 6 (23.1) | 12 (34.3) | 0.343 |
| Temp≤39℃ | 21 (34.4) | 12 (46.2) | 9 (25.7) | 0.097 |
| Skin pain | 19 (31.1) | 6 (23.1) | 13 (37.1) | 0.241 |
| Lower extremity edema | 4 (6.6) | 2 (7.7) | 2 (5.7) | ＞0.999 |
| Arthralgia | 4 (6.6) | 0 (0.0) | 4 (11.4) | 0.208 |
| GPPGA score at baselinea | 3.0 (3.0, 3.0) | 3.0 (3.0, 3.0) | 3.0 (3.0, 3.0) | 0.942 |
| Pustule subscore at baselinea | 3.0 (2.0, 4.0) | 3.5 (3.0, 4.0) | 3.0 (2.0, 4.0) | 0.362 |
| The hospitalization time, day | 8.0 (6.0, 12.0) | 9.0 (7.0, 11.0) | 8.0 (6.0, 13.0) | 0.817 |
| The fever normalization time, day | 4.0 (2.0, 6.0) | 4.0 (2.5, 4.5) | 4.0 (1.3, 7.5) | 0.756 |
| The pustule clearance time, day | 7.0 (4.0, 9.0) | 7.0 (5.0, 9.5) | 5.0 (3.0, 8.0) | 0.285 |
| Effective ratea, % | 98.2 | 95.5 | 100.0 | 0.400 |
| Pustule clearance ratea, % | 76.4 | 77.3 | 75.8 | 0.897 |

Data are presented as mean±SD, median (IQR), or n (%).

GPP, generalized pustular; PV, psoriasis; GPPGA, Generalized Pustular Psoriasis Physician Global Assessment.

aData are available in 55 cases.

*P* values represent a comparison between GPP with PV vs GPP without PV.
